# Supplementary material for: Kinetics, Isotherms and Adsorption–Desorption Behavior of Phosphorus from Aqueous Solution Using Zirconium–Iron and Iron Modified Biosolid Biochars
Source: MDPI journal article supplement (doi:10.3390/w13233320), 2021-11-23
Supplement: s1 [file s1]

Archive with 1 entries (1 files):
- water-1458781-supplementary.pdf
